# Supplementary material for: Enhanced Cellular Uptake of H-Chain Human Ferritin Containing Gold Nanoparticles
Source: MDPI journal article supplement (doi:10.3390/pharmaceutics13111966), 2021-11-19
Supplement: s1 [file s1]

# Supplementary Materials: Enhanced Cellular Uptake of H-Chain Human Ferritin Containing Gold Nanoparticles

Italo Moglia, Margarita Santiago, Simón Guerrero, Mónica Soler, Álvaro Olivera-Nappa and Marcelo J. Kogan

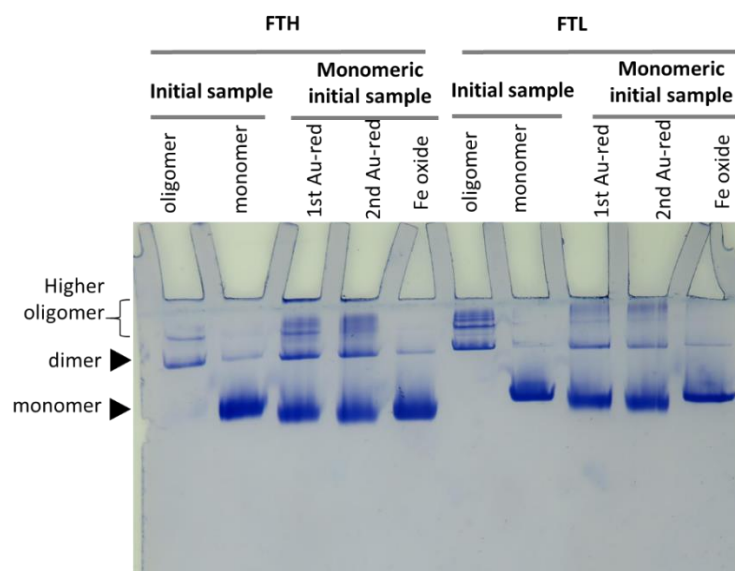

**Figure S1.** Native PAGE of ferritin samples.

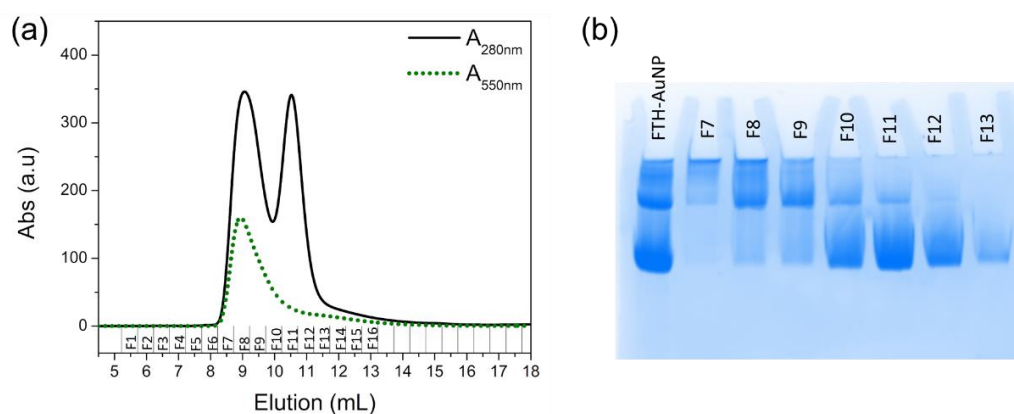

**Figure S2.** FTH-AuNP SEC chromatogram (a) and Native PAGE of elution fractions (b).

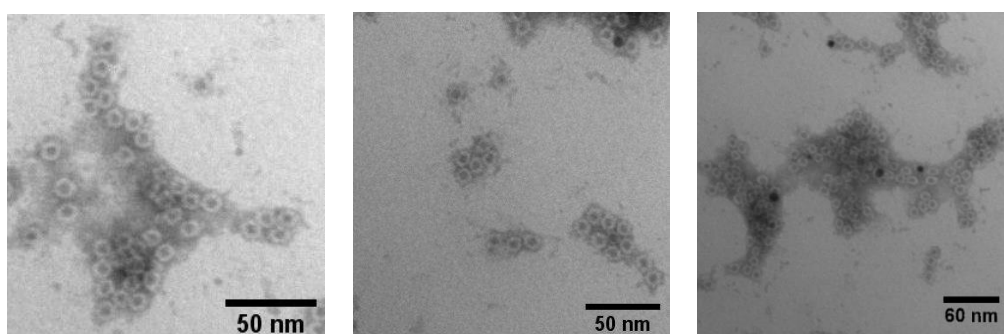

**Figure S3.** TEM analysis for FTH-AuNP samples with negative staining.
